# Supplementary material for: Host–guest complexation between 1,4-dipropoxypillar[5]arene and imidazolium-based ionic liquids
Source: Royal Society of Chemistry journal article supplement (doi:10.1039/c4ra06784c), 2014-01-01
Supplement: c4ra06784c1.pdf [file c4ra06784c1.pdf]

## Host–guest complexation between 1,4-dipropoxypillar[5]arene and imidazolium-based ionic liquids †

Lingyan Gao,<sup>a</sup> Yong Yao,<sup>a</sup> Shengyi Dong,<sup>\*a</sup> and Jiayin Yuan<sup>\*b</sup>

<sup>a</sup>*Department of Chemistry, Zhejiang University, Hangzhou 310027, P. R. China*

*Fax: +86-571-8795-1895; Tel: +86-571-8795-3189; Email address: dongsyzju@zju.edu.cn.*

<sup>b</sup>*Max Planck Institute of Colloids and Interfaces, Potsdam 14476, Germany,*

*Jiayin.Yuan@mpikg.mpg.de*

### Electronic Supplementary Information (16 pages)

|    |                                                                                                        |     |
|----|--------------------------------------------------------------------------------------------------------|-----|
| 1  | <i>Materials and methods</i>                                                                           | S2  |
| 2  | <i>Synthesis of AB<sub>2</sub> monomer 3</i>                                                           | S2  |
| 3  | <i>2D NOESY spectrum of an equimolar mixture of DPP5 and 2a</i>                                        | S4  |
| 4. | <i>Stoichiometry and association constant determination for the complexation between DPP5 and 2a–g</i> | S5  |
| 5  | <i>Mass spectrum of host–guest complexes</i>                                                           | S13 |
| 6  | <i>X-ray crystal data of 3</i>                                                                         | S15 |
|    | <i>References</i>                                                                                      | S16 |

## 1. Materials and methods

All reagents were commercially available and used as supplied without further purification. 1,4-Dipropoxybenzene<sup>S1a</sup> **DPP5**<sup>S1b</sup> and 1,4-bis(2-bromoethoxy)benzene<sup>S1c</sup> were synthesized according to literature procedures. <sup>1</sup>H NMR spectra were collected on a temperature-controlled Bruker AVANCE DMX-400 spectrometer. <sup>13</sup>C NMR spectra were recorded on a Bruker AVANCE DMX-400 spectrometer at 100 MHz. Low-resolution electrospray ionization (LRESI) mass spectra were obtained on a Bruker Esquire 3000 plus mass spectrometer (Bruker-Franzen Analytik GmbH Bremen, Germany) equipped with an ESI interface and an ion trap analyzer.

## 2. Synthesis of AB<sub>2</sub> monomer **3**

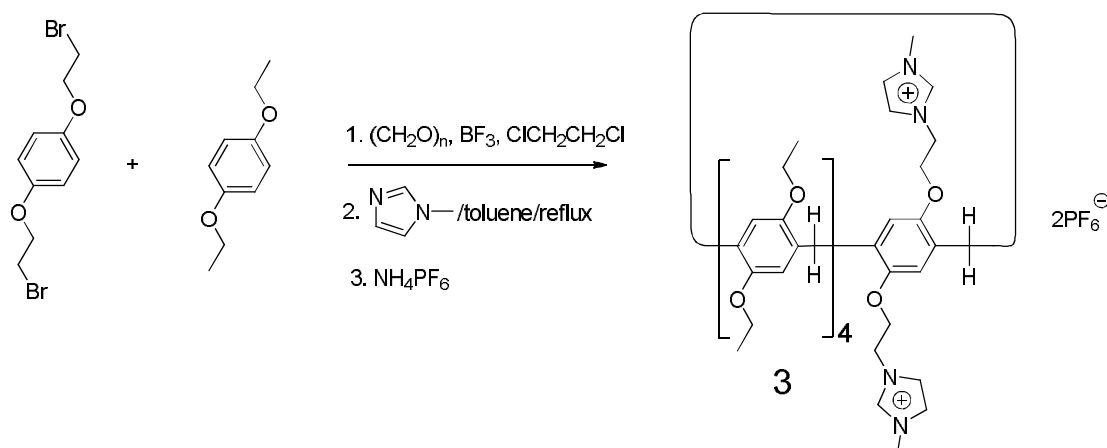

A mixture of 1,4-bis(2-bromoethoxy)benzene (1.60 g, 5.00 mmol), 1,4-diethoxybenzene (8.30 g, 50.0 mmol), boron trifluoride etherate (12 mL), paraformaldehyde (5.70 g, 150 mmol) and  $\text{ClCH}_2\text{CH}_2\text{Cl}$  (500 mL) was stirred at room temperature for half an hour. Then a saturated aqueous solution of  $\text{NaHCO}_3$  was dropped to the mixture. After filtration, the organic layer was separated, washed with water and brine, and dried over  $\text{Na}_2\text{SO}_4$ . The solvent was removed to get a white solid, which was used for the next step without further purification. This white solid and 1-methyl-1H-imidazole (8.20 g, 100 mmol) was stirred under reflux in toluene overnight. The solution was evaporated under vacuo and the residue was dissolved in water. A saturated aqueous solution of  $\text{NH}_4\text{PF}_6$  was added to afford a white solid, which was purified by chromatography on silica gel ( $\text{CH}_3\text{COOC}_2\text{H}_5/\text{CH}_3\text{CN}$ , v/v 4:1  $\rightarrow$  2:1) to obtain **3**. (1.10 g, 25%). Melting point: 137.5–140.1 °C. <sup>1</sup>H NMR (400 MHz,  $\text{CD}_3\text{CN}$ , 295 K)  $\delta$  (ppm): 7.25 (2H, s), 6.98 (4H,  $J = 4.0$  Hz, d), 6.87 (2H, s),

6.76 (4H,  $J = 4.0$  Hz, d), 6.58 (2H, s), 6.24 (2H, s), 4.38 (4H,  $J = 4.0$  Hz, t), 4.29 (4H,  $J = 4.0$  Hz, t), 3.97–3.88 (12H, m), 3.82–3.76 (8H, m), 3.67 (2H, s), 3.65 (4H, s), 2.86 (6H, s), 1.42–1.37 (24H, m).  $^{13}\text{C}$  NMR (100 MHz,  $\text{CD}_3\text{CN}$ , 295 K)  $\delta$  (ppm): 149.70, 149.41, 149.24, 149.03, 148.41, 135.34, 129.17, 128.26, 128.10, 127.94, 127.79, 123.16, 121.68, 114.73, 114.45, 114.23, 113.57, 113.37, 65.09, 64.07, 63.79, 63.61, 63.35, 49.48, 34.49, 29.11, 28.81, 28.59, 14.35, 14.27. LRESIMS:  $m/z$  1197.6  $[\text{M} - \text{PF}_6]^+$  (36%),  $m/z$  1051.8  $[\text{M} - 2\text{HPF}_6 - \text{H}]^+$  (100%). HRESIMS:  $m/z$  calcd for  $[\text{M} - \text{PF}_6]^+ \text{C}_{63}\text{H}_{80}\text{F}_6\text{N}_4\text{O}_{10}\text{P}^+$ , 1197.5516; found 1197.5504; error  $-1.2$  ppm.

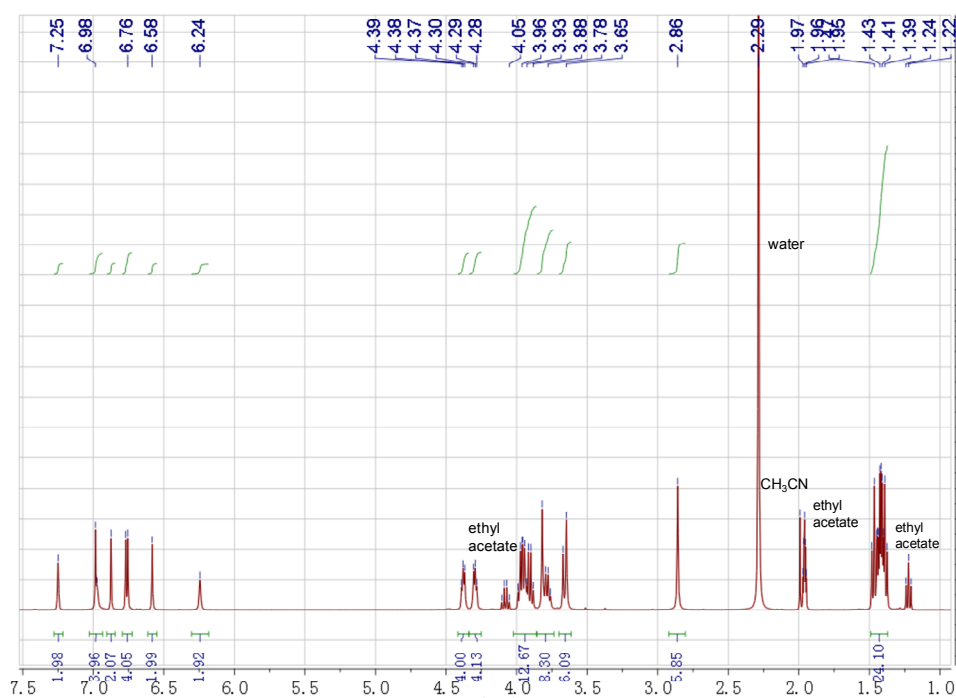

**Fig. S1**  $^1\text{H}$  NMR spectrum (400 MHz,  $\text{CD}_3\text{CN}$ , 22 °C) of **3**.

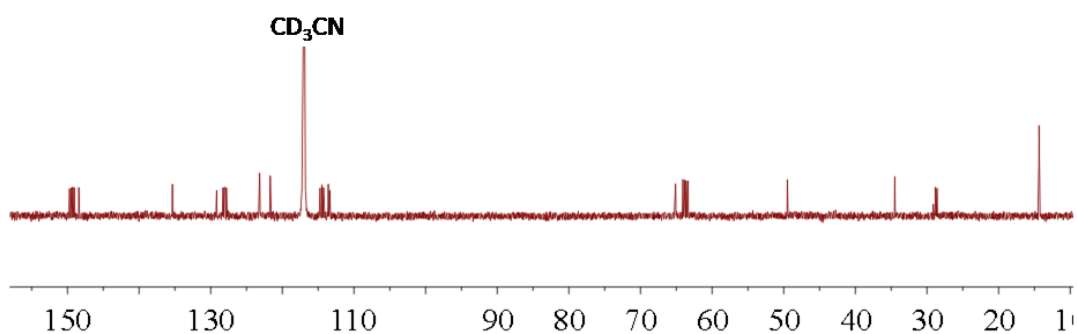

**Fig. S2**  $^{13}\text{C}$  NMR spectrum (100 MHz,  $\text{CD}_3\text{CN}$ , 22 °C) of **3**.

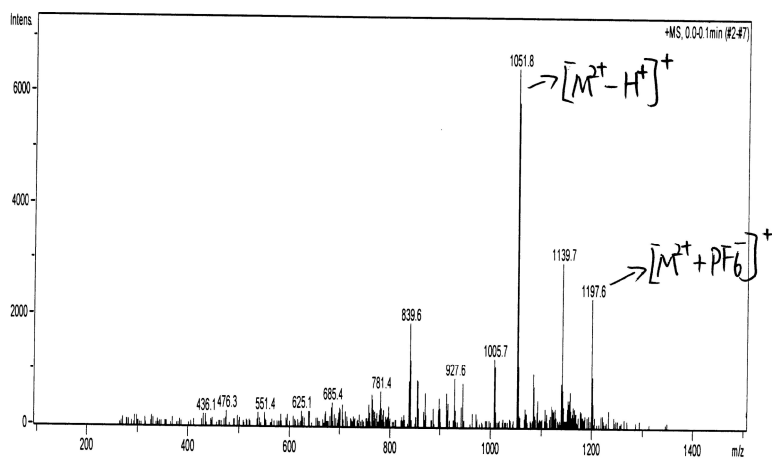

**Fig. S3** LRESI mass spectrum of **3**.

3. 2D NOESY spectrum of an equimolar mixture of **DPP5** and **2a**

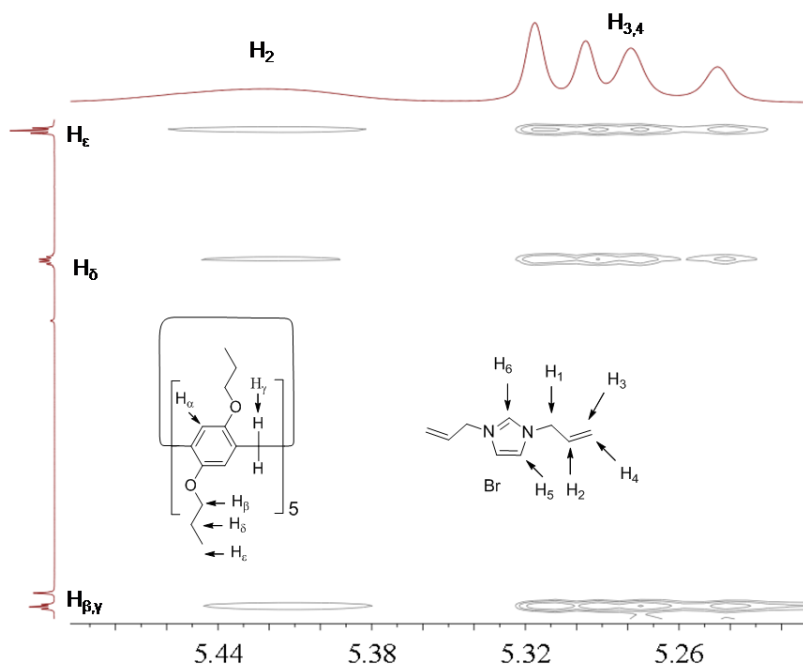

**Fig. S4** Partial 2D NOESY spectrum of an equimolar mixture of **DPP5** and **2a** (400 MHz,  $\text{CDCl}_3$ , 22 °C).

4. Stoichiometry and association constants determination for the complexation between **DPP5** and **2a–g**

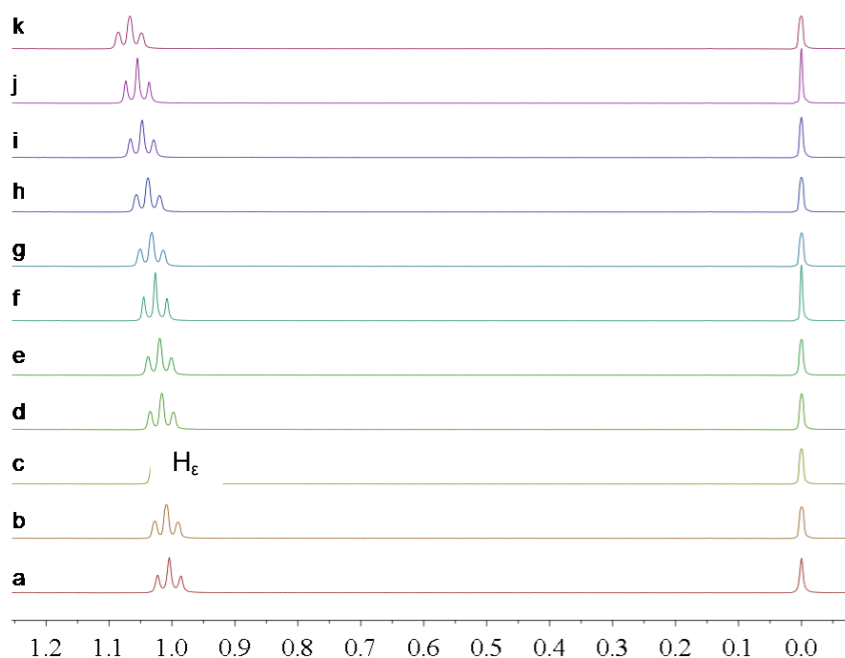

**Fig. S5** Partial  $^1\text{H}$  NMR spectra (400 MHz,  $\text{CDCl}_3$ , 22  $^\circ\text{C}$ ) of **DPP5** at a constant concentration of 2.00 mM upon addition of **G (2a, 15 mM)**: (a) 0.00  $\mu\text{L}$ , (b) 10.0  $\mu\text{L}$  to a, (c) 10.0  $\mu\text{L}$  to b, (d) 10.0  $\mu\text{L}$  to c, (e) 10.0  $\mu\text{L}$  to d, (f) 25.0  $\mu\text{L}$  to e, (g) 25.0  $\mu\text{L}$  to f, (h) 25.0  $\mu\text{L}$  to g, (i) 50.0  $\mu\text{L}$  to h, (j) 50.0  $\mu\text{L}$  to i, (k) 100  $\mu\text{L}$  to j, (l) 100  $\mu\text{L}$  to k.

To determine the stoichiometry and association constant between **DPP5** and **2a (G)**, NMR titrations were done with solutions which had a constant concentration of **DPP5** (2 mM) and varying concentrations of **G**. By a non-linear curve-fitting method, the association constant ( $K_a$ ) of **DPP5** $\rightarrow$ **2a** was estimated to be about  $9.50 (\pm 0.16) \times 10 \text{ M}^{-1}$ . By a mole ratio plot, a 1:1 stoichiometry was obtained.

The non-linear curve-fitting was based on the equation:<sup>S2</sup>

$$\Delta\delta = (\Delta\delta_\infty/[\text{H}]_0) (0.5[\text{G}]_0 + 0.5([\text{H}]_0 + 1/K_a) - (0.5([\text{G}]_0^2 + 2[\text{G}]_0(1/K_a - [\text{H}]_0) + (1/K_a + [\text{H}]_0)^2)^{0.5}))$$

(Eq. S1)

Where  $\Delta\delta$  is the chemical shift change of  $\text{H}_\epsilon$  on **DPP5** at  $[\text{G}]_0$ ,  $\Delta\delta_\infty$  is the chemical shift change of  $\text{H}_\epsilon$  when the host is completely complexed,  $[\text{H}]_0$  is the fixed initial concentration of the host, and  $[\text{G}]_0$  is the initial concentration of **G**.

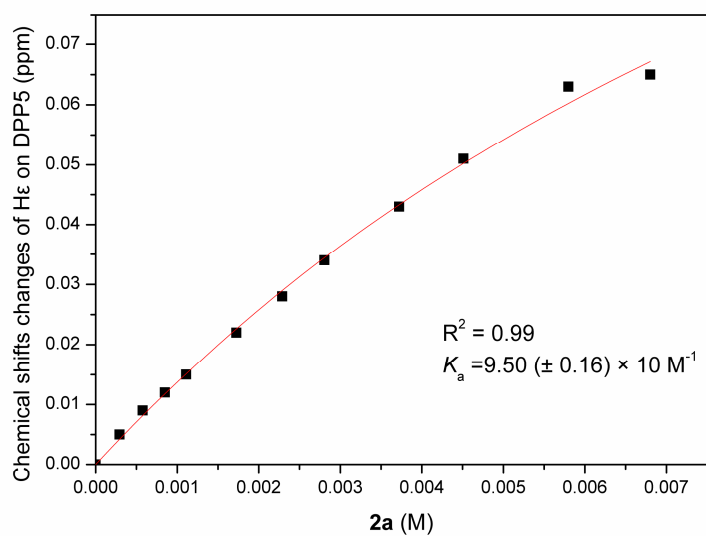

**Fig. S6** The chemical shift changes of H $\epsilon$  on **DPP5** upon addition of **2a**.

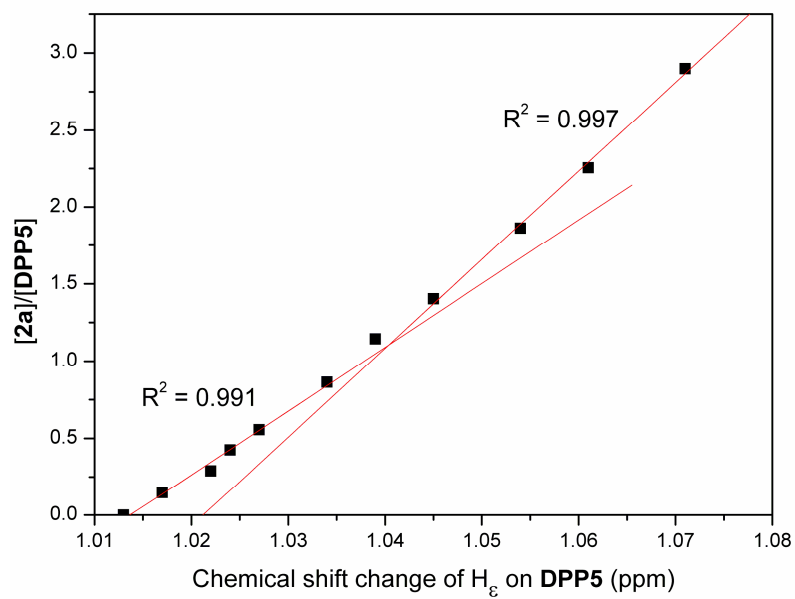

**Fig. S7** Mole ratio plot for the complexation between **DPP5** and **2a**, indicating a 1:1 stoichiometry.

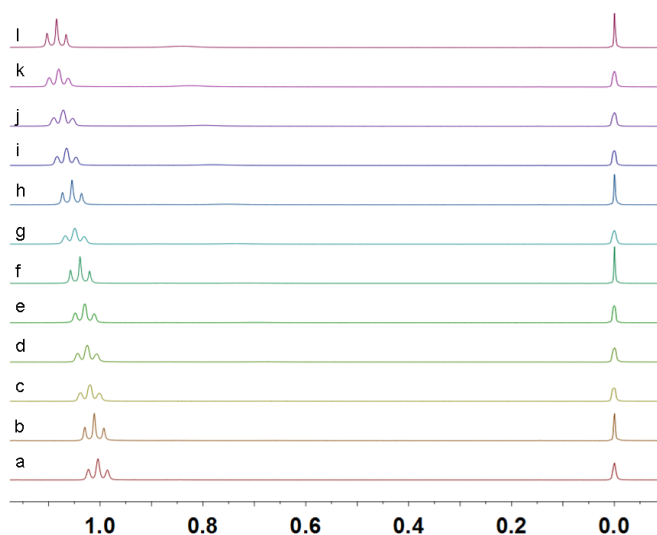

**Fig. S8** Partial  $^1\text{H}$  NMR spectra (400 MHz,  $\text{CDCl}_3$ , 22  $^\circ\text{C}$ ) of **DPP5** at a constant concentration of 2.00 mM upon addition of **G** (**2b**, 15 mM): (a) 0.00  $\mu\text{L}$ , (b) 10.0  $\mu\text{L}$  to a, (c) 10.0  $\mu\text{L}$  to b, (d) 10.0  $\mu\text{L}$  to c, (e) 10.0  $\mu\text{L}$  to d, (f) 25.0  $\mu\text{L}$  to e, (g) 25.0  $\mu\text{L}$  to f, (h) 25.0  $\mu\text{L}$  to g, (i) 50.0  $\mu\text{L}$  to h, (j) 50.0  $\mu\text{L}$  to i, (k) 100  $\mu\text{L}$  to j, (l) 100  $\mu\text{L}$  to k.

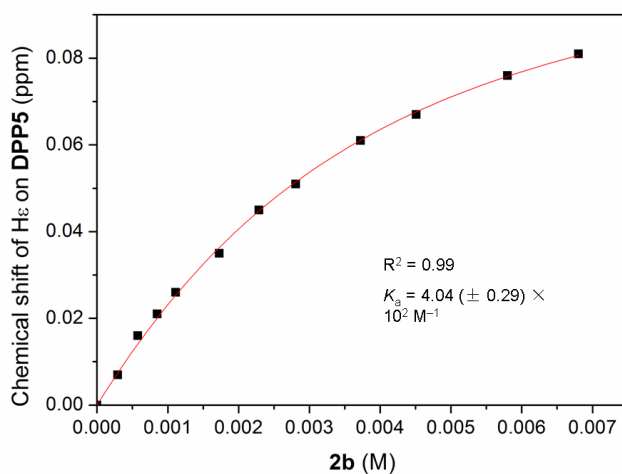

**Fig. S9** The chemical shift changes of  $\text{H}_{\epsilon}$  on **DPP5** upon addition of **2b**.

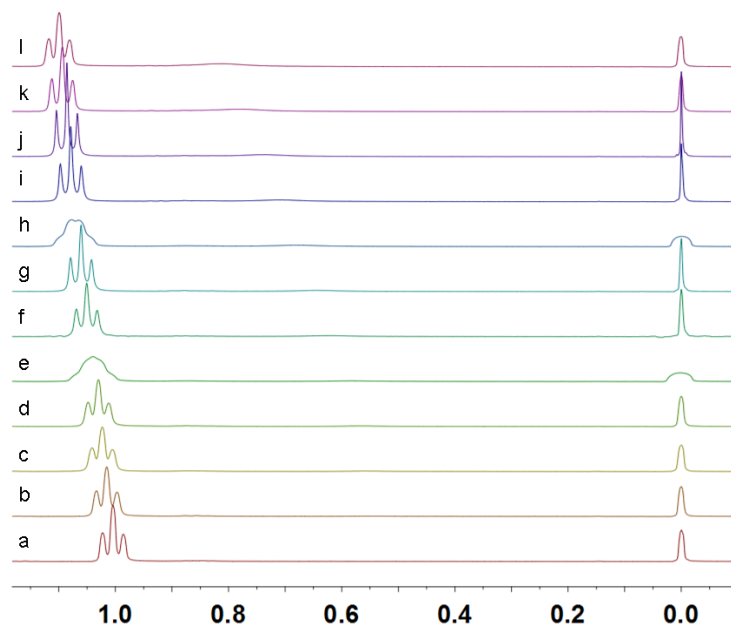

**Fig. S10** Partial  $^1\text{H}$  NMR spectra (400 MHz,  $\text{CDCl}_3$ , 22  $^\circ\text{C}$ ) of **DPP5** at a constant concentration of 2.00 mM upon addition of **G** (**2c**, 15 mM): (a) 0.00  $\mu\text{L}$ , (b) 10.0  $\mu\text{L}$  to a, (c) 10.0  $\mu\text{L}$  to b, (d) 10.0  $\mu\text{L}$  to c, (e) 10.0  $\mu\text{L}$  to d, (f) 25.0  $\mu\text{L}$  to e, (g) 25.0  $\mu\text{L}$  to f, (h) 25.0  $\mu\text{L}$  to g, (i) 50.0  $\mu\text{L}$  to h, (j) 50.0  $\mu\text{L}$  to i, (k) 100  $\mu\text{L}$  to j, (l) 100  $\mu\text{L}$  to k.

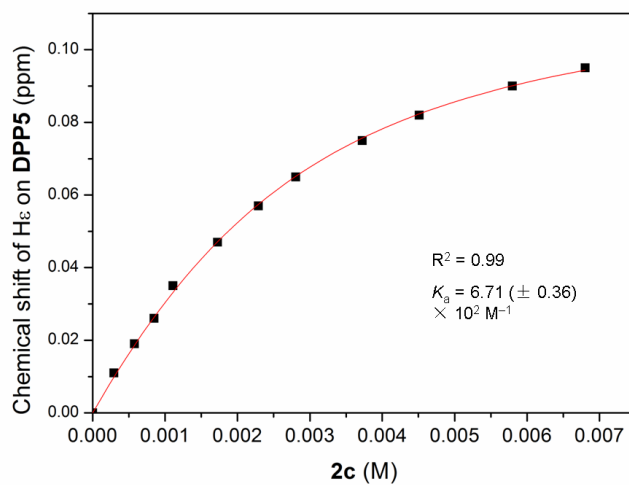

**Fig. S11** The chemical shift changes of  $\text{H}_c$  on **DPP5** upon addition of **2c**.



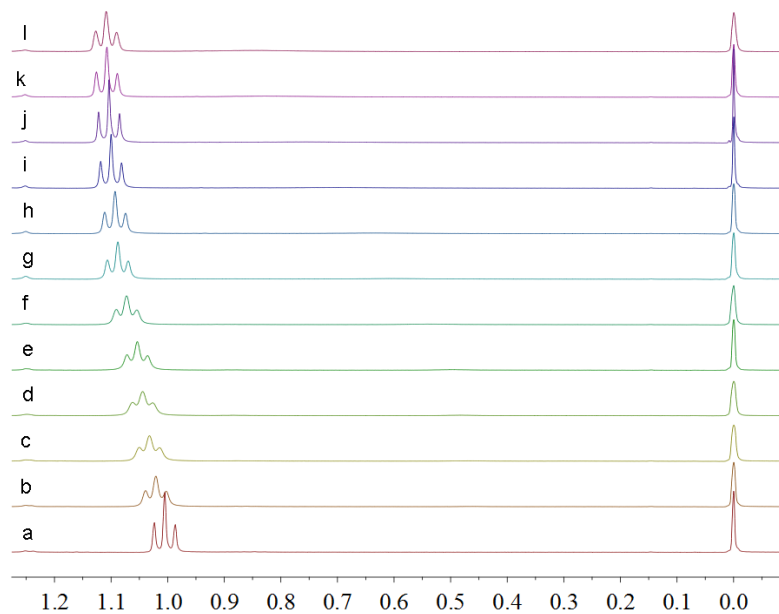

**Fig. S12** Partial  $^1\text{H}$  NMR spectra (400 MHz,  $\text{CDCl}_3$ , 22  $^\circ\text{C}$ ) of **DPP5** at a constant concentration of 2.00 mM upon addition of **G** (**2d**, 15 mM): (a) 0.00  $\mu\text{L}$ , (b) 10.0  $\mu\text{L}$  to a, (c) 10.0  $\mu\text{L}$  to b, (d) 10.0  $\mu\text{L}$  to c, (e) 10.0  $\mu\text{L}$  to d, (f) 25.0  $\mu\text{L}$  to e, (g) 25.0  $\mu\text{L}$  to f, (h) 25.0  $\mu\text{L}$  to g, (i) 50.0  $\mu\text{L}$  to h, (j) 50.0  $\mu\text{L}$  to i, (k) 100  $\mu\text{L}$  to j, (l) 100  $\mu\text{L}$  to k.

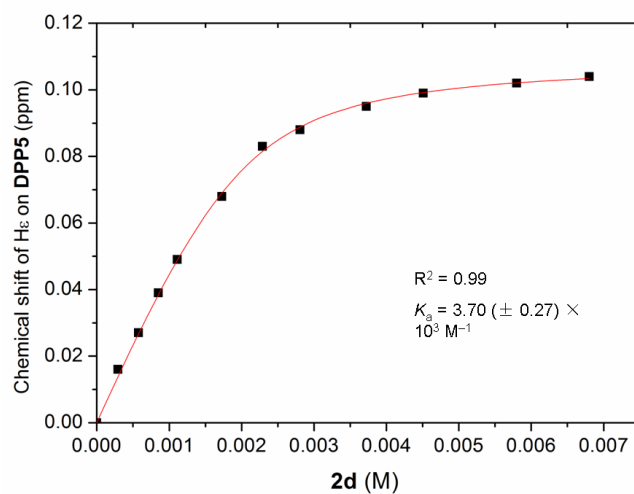

**Fig. S13** The chemical shift changes of  $\text{H}_c$  on **DPP5** upon addition of **2d**.

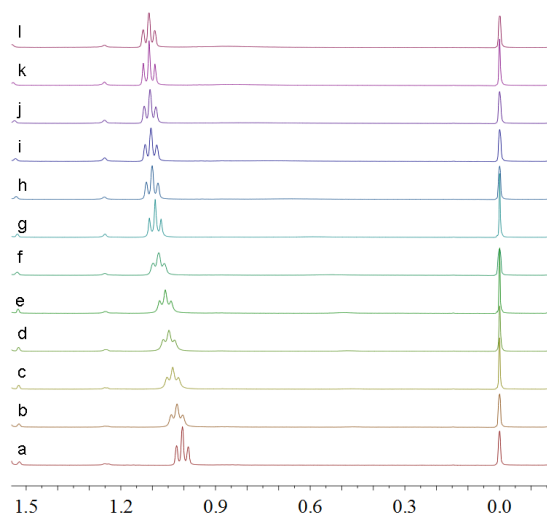

**Fig. S14** Partial  $^1\text{H}$  NMR spectra (400 MHz,  $\text{CDCl}_3$ , 22  $^\circ\text{C}$ ) of **DPP5** at a constant concentration of 2.00 mM upon addition of **G** (**2e**, 15 mM): (a) 0.00  $\mu\text{L}$ , (b) 10.0  $\mu\text{L}$  to a, (c) 10.0  $\mu\text{L}$  to b, (d) 10.0  $\mu\text{L}$  to c, (e) 10.0  $\mu\text{L}$  to d, (f) 25.0  $\mu\text{L}$  to e, (g) 25.0  $\mu\text{L}$  to f, (h) 25.0  $\mu\text{L}$  to g, (i) 50.0  $\mu\text{L}$  to h, (j) 50.0  $\mu\text{L}$  to i, (k) 100  $\mu\text{L}$  to j, (l) 100  $\mu\text{L}$  to k.

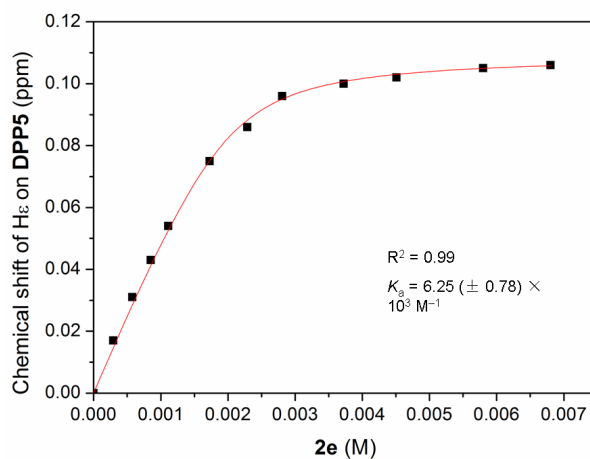

**Fig. S15** The chemical shift changes of  $\text{H}_\epsilon$  on **DPP5** upon addition of **2e**.

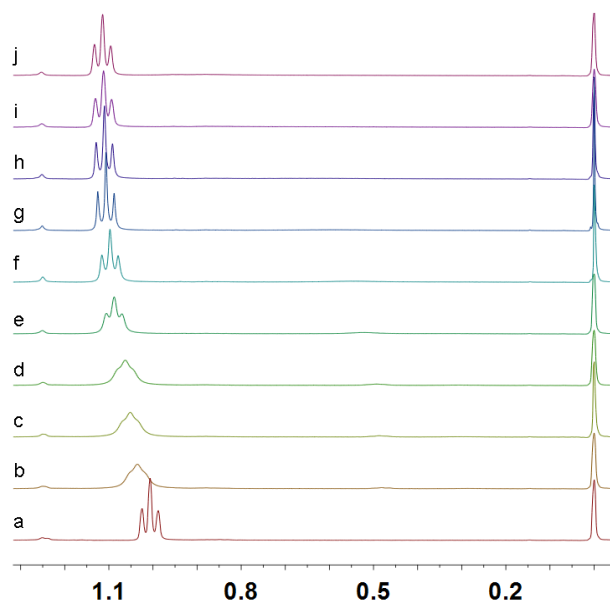

**Fig. S16** Partial  $^1\text{H}$  NMR spectra (400 MHz,  $\text{CDCl}_3$ , 22  $^\circ\text{C}$ ) of **DPP5** at a constant concentration of 2.00 mM upon addition of **G** (**2f**, 15 mM): (a) 0.00  $\mu\text{L}$ , (b) 20.0  $\mu\text{L}$  to a, (c) 10.0  $\mu\text{L}$  to b, (d) 10.0  $\mu\text{L}$  to c, (e) 25.0  $\mu\text{L}$  to d, (f) 50.0  $\mu\text{L}$  to e, (g) 50.0  $\mu\text{L}$  to f, (h) 50.0  $\mu\text{L}$  to g, (i) 100.0  $\mu\text{L}$  to h, (j) 100.0  $\mu\text{L}$  to i.

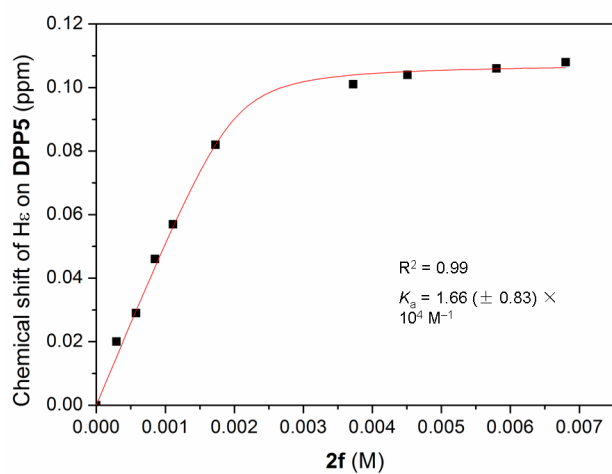

**Fig. S17** The chemical shift changes of  $\text{H}_c$  on **DPP5** upon addition of **2f**.

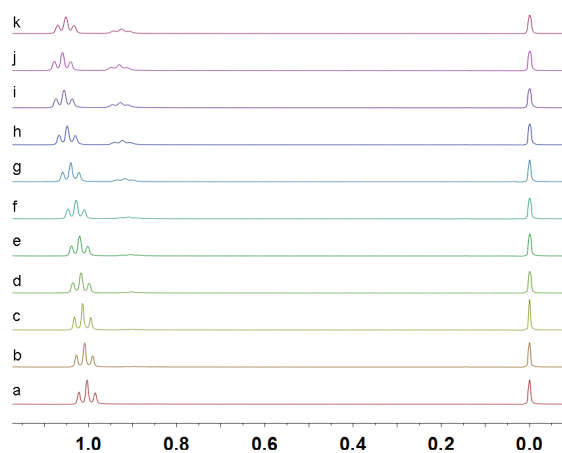

**Fig. S18** Partial  $^1\text{H}$  NMR spectra (400 MHz,  $\text{CDCl}_3$ , 22  $^\circ\text{C}$ ) of **DPP5** at a constant concentration of 2.00 mM upon addition of **G** (**2g**, 15 mM): (a) 0.00  $\mu\text{L}$ , (b) 10.0  $\mu\text{L}$  to a, (c) 10.0  $\mu\text{L}$  to b, (d) 10.0  $\mu\text{L}$  to c, (e) 10.0  $\mu\text{L}$  to d, (f) 25.0  $\mu\text{L}$  to e, (g) 25.0  $\mu\text{L}$  to f, (h) 25.0  $\mu\text{L}$  to g, (i) 50.0  $\mu\text{L}$  to h, (j) 50.0  $\mu\text{L}$  to i, (k) 200  $\mu\text{L}$  to j.

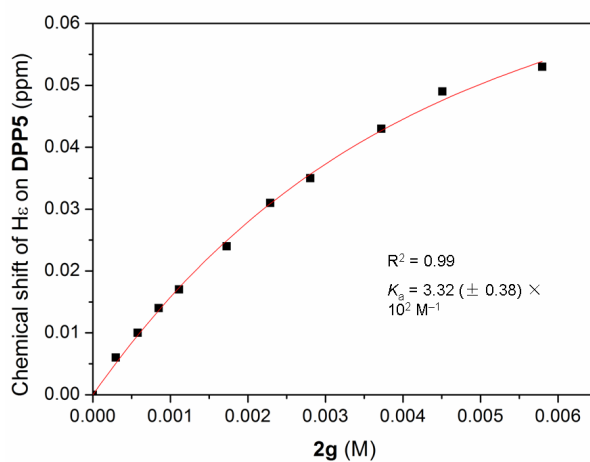

**Fig. S19** The chemical shift changes of  $\text{H}_\epsilon$  on **DPP5** upon addition of **2g**.

## 5. Mass spectrum of host-guest complexes

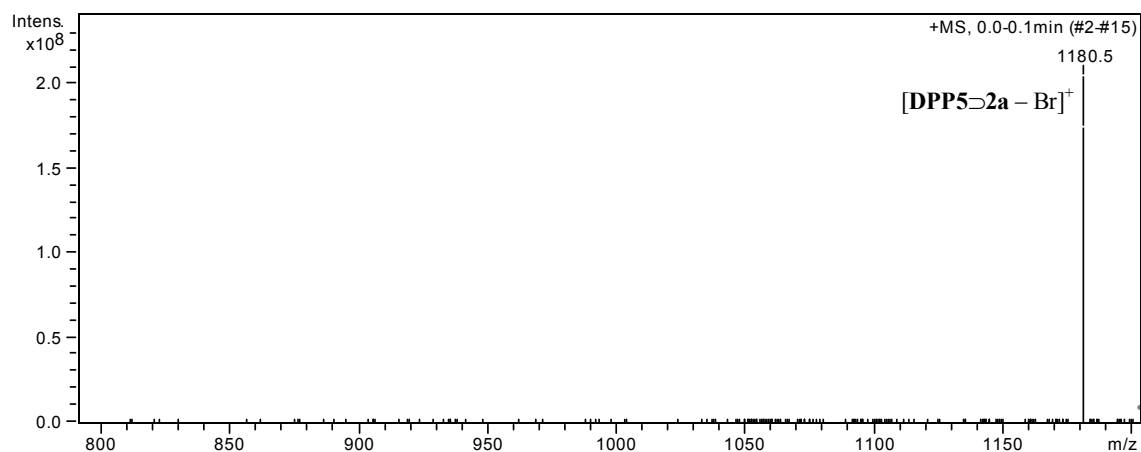

**Fig. S20** Mass spectrum of the host-guest complex prepared from **DPP5** and **2a**.

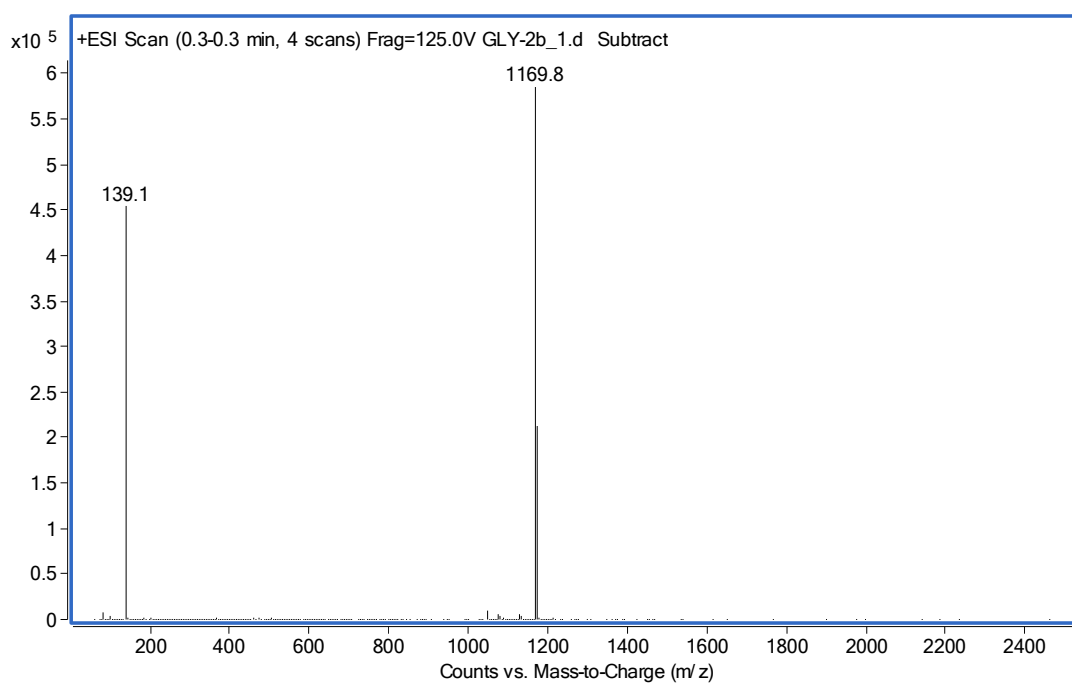

**Fig. S21** Mass spectrum of the host-guest complex prepared from **DPP5** and **2b**.

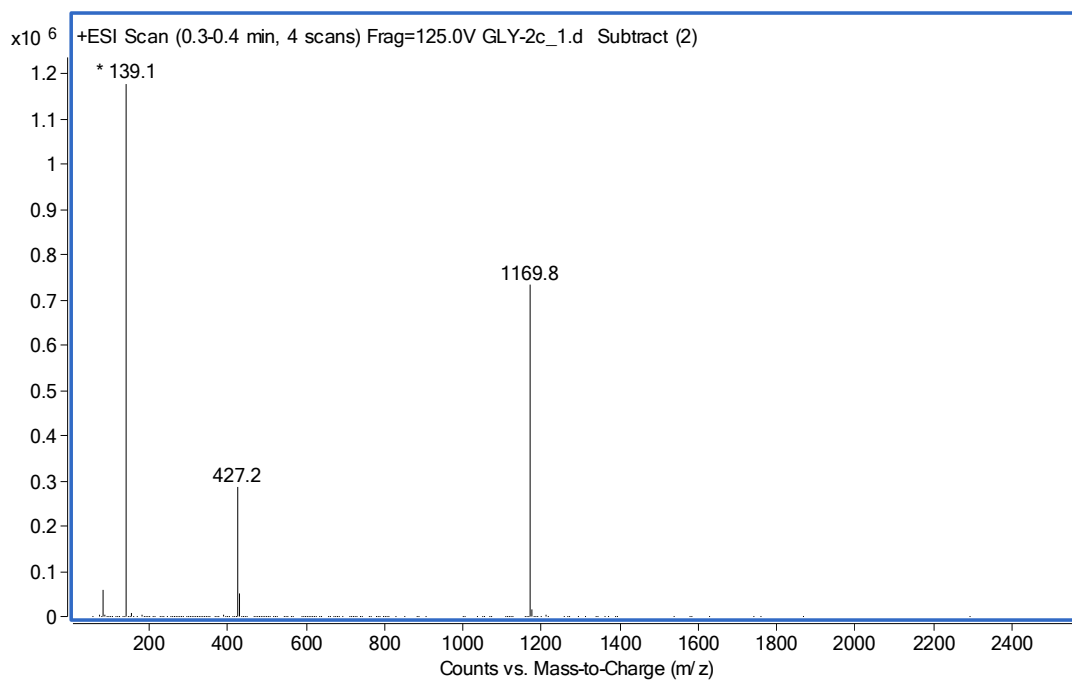

**Fig. S22** Mass spectrum of the host-guest complex prepared from **DPP5** and **2c**.

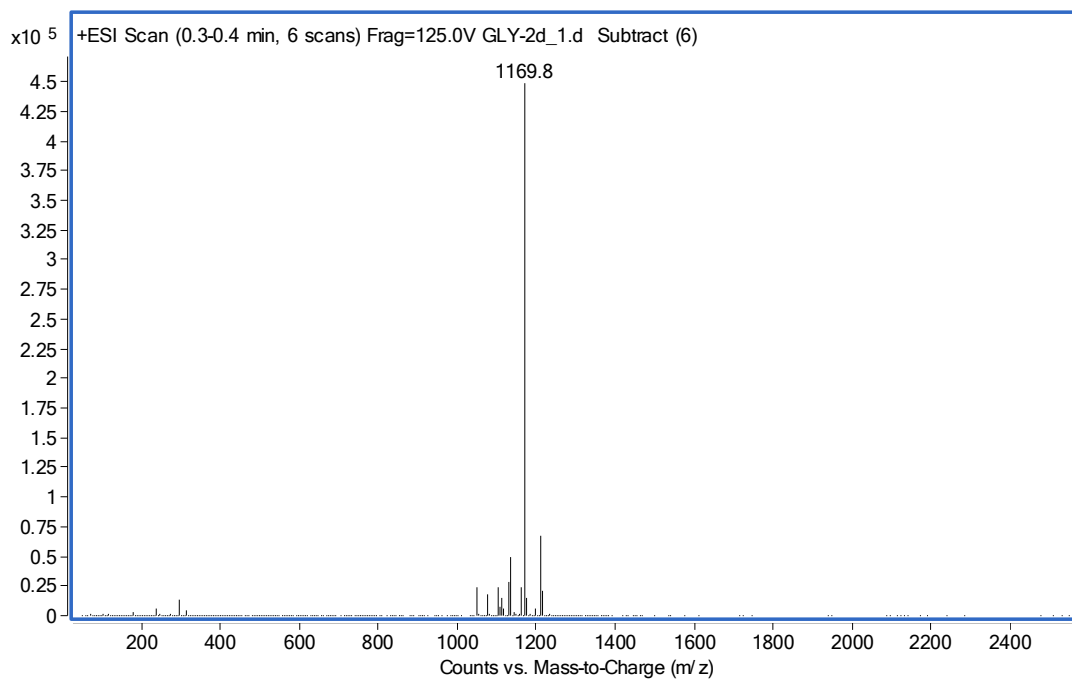

**Fig. S23** Mass spectrum of the host-guest complex prepared from **DPP5** and **2d**.

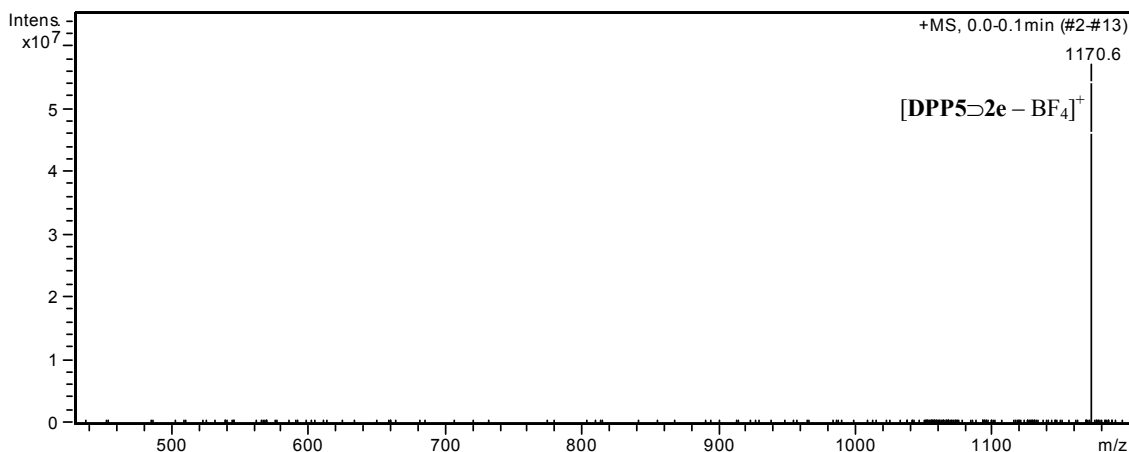

**Fig. S24** Mass spectrum of the host-guest complex prepared from **DPP5** and **2e**.

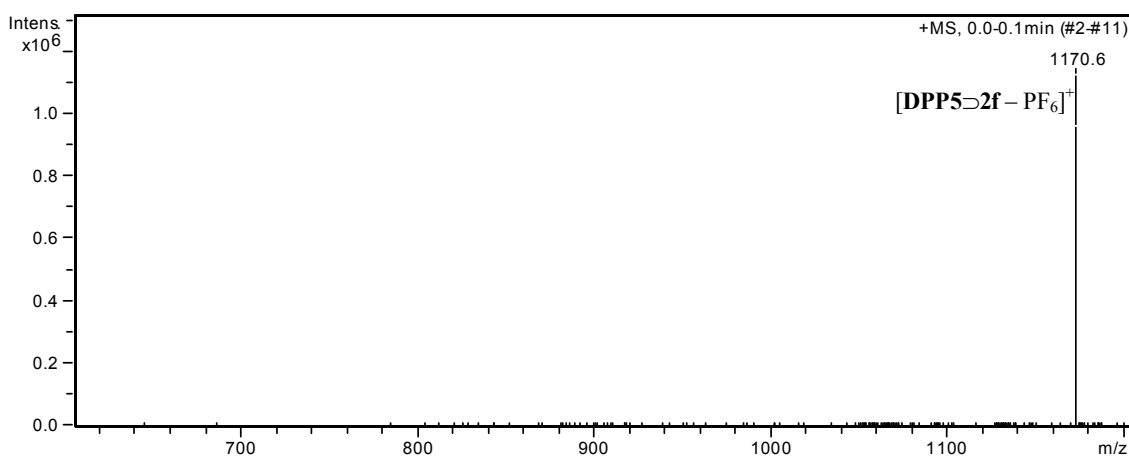

**Fig. S25** Mass spectrum of the host-guest complex prepared from **DPP5** and **2f**.

### 6. X-ray crystal data of **3**

Crystal data of **3**: colorless,  $C_{63}H_{80}F_{12}N_4O_{10}P_2$ ,  $FW$  1342.25, Triclinic, space group P - 1,  $a = 12.7806(6)$ ,  $b = 14.6895(6)$ ,  $c = 20.5104(10)$  Å,  $\alpha = 110.228(4)^\circ$ ,  $\beta = 102.002(4)^\circ$ ,  $\gamma = 97.058(4)^\circ$ ,  $V = 3453.7(3)$  Å<sup>3</sup>,  $Z = 2$ ,  $D_c = 1.292$  g cm<sup>-3</sup>,  $T = 120(2)$  K,  $\mu = 1.343$  mm<sup>-1</sup>, 21537 measured reflections, 12021 independent reflections, 831 parameters, 0 restraints,  $F(000) = 1408$ ,  $R_1 = 0.1166$ ,  $wR_2 = 0.3021$  (all data),  $R_1 = 0.0938$ ,  $wR_2 = 0.2742$  [ $I > 2\sigma(I)$ ], max. residual density 0.932 e•Å<sup>-3</sup>, and goodness-of-fit ( $F^2$ ) = 1.130. CCDC-914822.

*References:*

- S1. (a) R. Castro, K. R. Nixon, J. D. Evanseck and A. E. Kaifer, *J. Org. Chem.*, 1996, **61**, 7298–7303; (b) G. Yu, C. You, Z Zhang, J. Chen, X. Yan, B. Zheng, S. Liu and F. Huang, *J. Am. Chem. Soc.*, 2012, **134**, 8711–8717; (c) Y. Yao, M. Xue, X. Chi, Y. Ma, J. He, Z. Abliz and F. Huang, *Chem. Commun.*, 2012, **48**, 6505–6507.
- S2. K. A. Connors, *Binding Constants*; Wiley: New York, 1987; P. S. Corbin, Ph.D. Dissertation, University of Illinois at Urbana-Champaign, Urbana, IL, 1999; P. R. Ashton, R. Ballardini, V. Balzani, M. Belohradsky, M. T. Gandolfi, D. Philp, L. Prodi, F. M. Raymo, M. V. Reddington, N. Spencer, J. F. Stoddart, M. Venturi and D. J. Williams, *J. Am. Chem. Soc.*, 1996, **118**, 4931–4951.
